# Supplementary material for: Hydroxytyrosol Recovers SARS-CoV-2-PLpro-Dependent Impairment of Interferon Related Genes in Polarized Human Airway, Intestinal and Liver Epithelial Cells
Source: MDPI journal article supplement (doi:10.3390/antiox11081466), 2022-07-27
Supplement: s1 [file s1]

## Supplementary Materials and Data

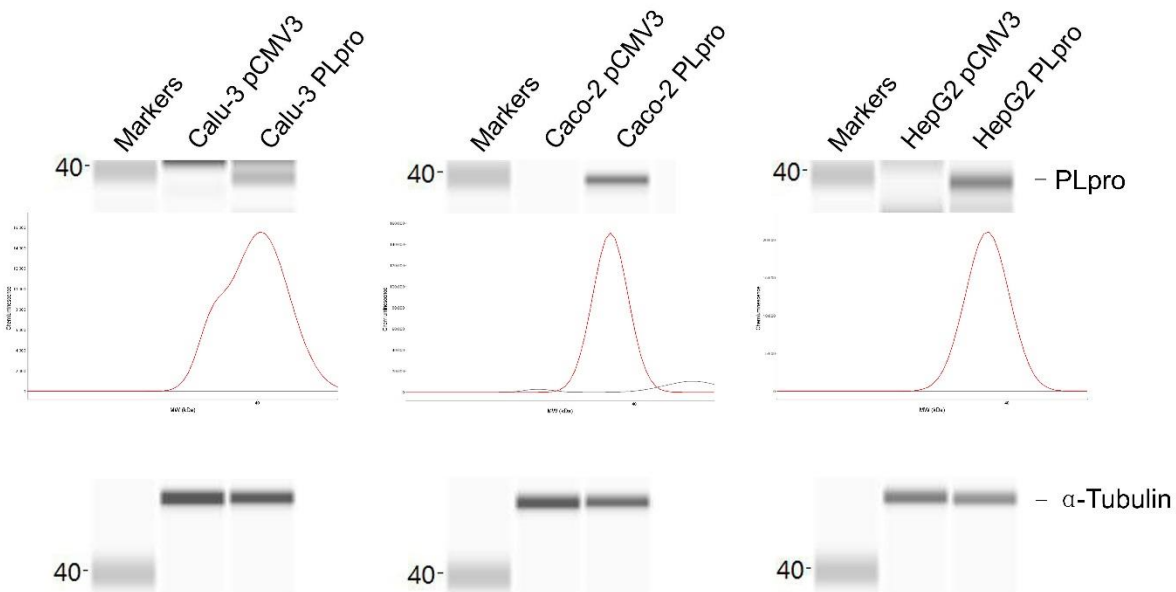

**Figure S1. Expression of PLpro protein in epithelial cells.** Detection of PLpro in Calu-3, Caco-2, and HepG2 cells by capillary western blot assay. Capillary western blot results for PLpro are shown as gel-like image view in the upper panels, electropherograms in the middle panels, and  $\alpha$ -Tubulin as a loading control in the lower panels.

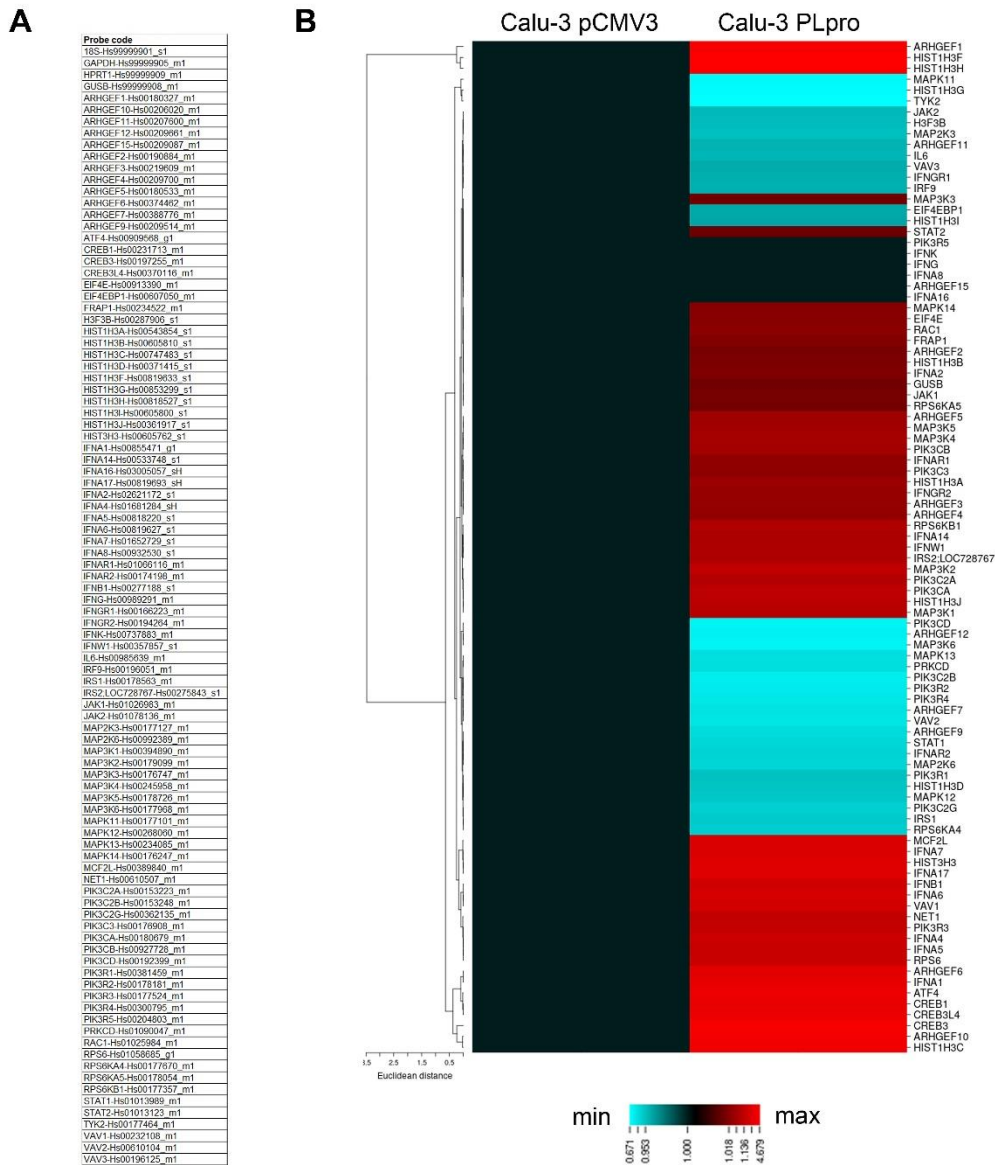

**Figure S2. PLpro expression up-regulates genes of IFN pathway.** (A) List of TaqMan Gene Expression Assays ID for each well on the 96 plate; (B) Heatmap representation of interferon-related genes analyzed by TaqMan® Array Human Interferon Pathway that were up-regulated (in red) or down-regulated (in light blue) in Calu-3 cells transfected with plasmid for PLpro (PLpro) or empty vector (pCMV3). Data are the mean  $\pm$  SD of three independent experiments.

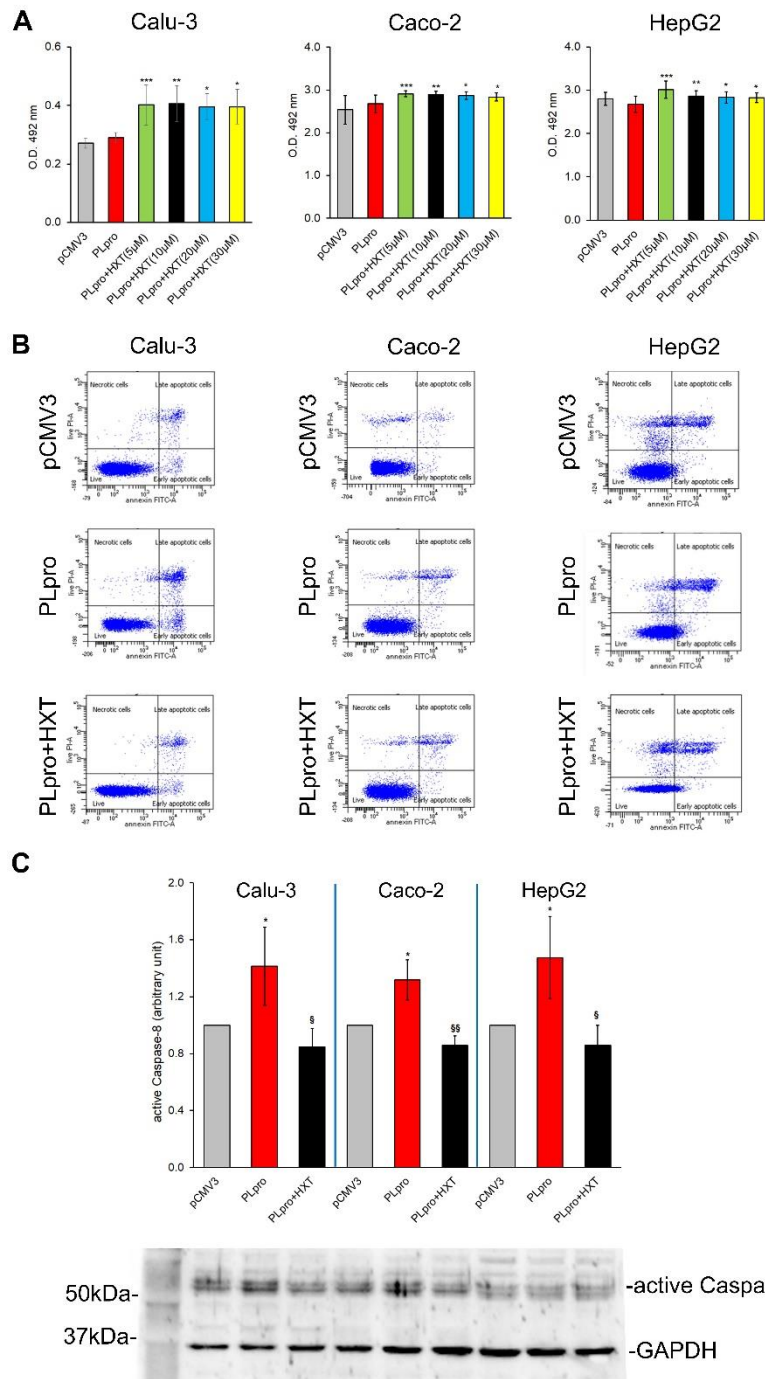

**Figure S3. Analysis of apoptosis.** (A) Cell viability assessed by XTT assay in Calu-3, Caco-2 and HepG2 cells transfected with plasmid for PLpro (PLpro) or empty vector (pCMV3) treated with or without 10  $\mu$ M HXT for 24 hours. Data refers to mean O.D. of two independent experiments repeated at least in quintupled. Data were analyzed by 2-tailed *t* tests, \**p* < 0.05, \*\**p* < 0.01, \*\*\**p* < 0.001 vs pCMV3. (B) Plots show the apoptotic rate of PLpro Calu-3, Caco-2 and HepG2 cells treated with or without 10  $\mu$ M HXT for 24 hours and compared to untreated (pCMV3) cells measured by FITC Annexin V and flow cytometry. (C) Densitometric analysis (upper panel) and representative western blotting (lower panel) for active Caspase-8 in Calu-3, Caco-2 and HepG2 cells transfected with empty vector (pCMV3), or with plasmid for PLpro (PLpro) subjected or not with 10  $\mu$ M HXT for 24 hours. GAPDH is reported as loading control. The original image is reported in the supplementary file name blots.

Data were analyzed by 2-tailed *t* tests, \**p* < 0.05 vs pCMV3; § *p* < 0.05, §§ *p* < 0.01 vs PLpro.

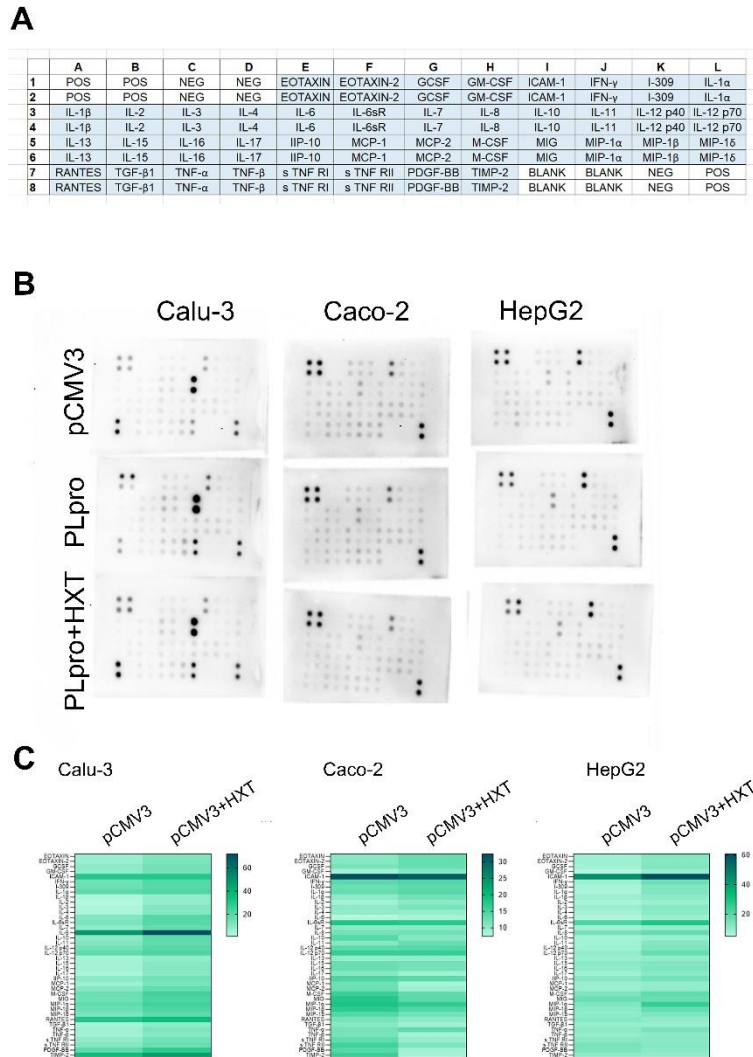

**Figure S4. Inflammatory pattern by antibody array.** (A) Layout of antibodies as spotted on the membrane (upper panel). The abbreviated names for 40 different cytokine probes are reported. (B) Representative photographs of cytokine arrays in which each cytokine is represented by duplicate spots on a single membrane (lower panel). (C) Heatmap representation of semi-quantitative expression of 40 pro-inflammatory cytokines and chemokines by antibody array in Calu-3, Caco-2, and HepG2 cells expressing pCMV3 treated or not with HXT.

**Table S1. Primers sequences for SYBR Green qRT-PCR.**

| <b>Genes</b>                   | <b>Accession number</b>  | <b>Sequence 5' - 3'</b>                                                  |
|--------------------------------|--------------------------|--------------------------------------------------------------------------|
| <b>SarsCoV2<br/>PLpro/NSP3</b> | NC_045512.2(4955-5905nt) | Forward: CAAGGGCTGGTGAAGCTGCTA<br>Reverse: CTTAAGGGTTGTCTGCTGTTGTCC      |
| <b>IFNA1</b>                   | NM_024013.3              | Forward: GGAGTTTGATGGCAACCAGT<br>Reverse: CTCTCCTCCTGCATCACACA           |
| <b>IFNA7</b>                   | NM_021057.2              | Forward: CAGACCCACAGCCTGCGT<br>Reverse: AAACCTCCTCCTCTGGGAATCTG          |
| <b>ATF4</b>                    | NM_182810.3              | Forward: TCAAACCTCATGGGTCTCC<br>Reverse: GTGTCATCCAACGTGGTCAG            |
| <b>CREB3</b>                   | NM_006368.5              | Forward: TTGCTAGGCTAGTACTGACAGATGA<br>Reverse: ATTTCAAGACCCTGCTCTCTAAACC |
| <b>CREB3L4</b>                 | NM_001255978.2           | Forward: CTCAAGAAGGTCAGGAGGAAAATCC<br>Reverse: CTGAGCTACCAAGGAGATGTTGTG  |
| <b>HIST3H3</b>                 | NM_003493.3              | Forward: GAGCTGCTAATCCGCAAGTT<br>Reverse: TGGATGACACACAGGTTGGT           |
| <b>HIST1H3F</b>                | NM_021018.3              | Forward: AGCTACTGATTCGCAAGCTACC<br>Reverse: ACAGGTTGGTGTCTCTCAAAGAG      |
| <b>HIST1H3H</b>                | NM_003536.3              | Forward: GATCAGAAAGCTGCCTTTTCAG<br>Reverse: GATGTCCTTGGGCATGATAGTC       |
| <b>MCF2L</b>                   | NM_015205.3              | Forward: ATGAAATCATGCACCAGGACAT<br>Reverse: CATGACATTCTGGAACTCCTTG       |
| <b>TNF-<math>\alpha</math></b> | NM_000594.4              | Forward: CCGAGTGACAAGCCTGTAGC<br>Reverse: AGGAGGTTGACCTTGGTCTG           |
| <b>IL-6</b>                    | NM_000600.5              | Forward: AGACAGCCACTCACCTCTTCAG<br>Reverse: TTCTGCCAGTGCCTCTTTGCTG       |
| <b>IL1-<math>\beta</math></b>  | NM_000576.3              | Forward: GCTGAGGAAGATGCTGGTTC<br>Reverse: TCCATATCCTGTCCCTGGAG           |
| <b>GAPDH</b>                   | NM_002046.7              | Forward: TCCAAAATCAAGTGGGGCGA<br>Reverse: TGATGACCCTTTTTGGCTCCC          |

Table S2. Means of raw data for pro-inflammatory protein array.

|                | Calu-3            |                   | Caco-2            |                   | HepG2             |                   |
|----------------|-------------------|-------------------|-------------------|-------------------|-------------------|-------------------|
|                | <i>Mean pCMV3</i> | <i>Mean PLpro</i> | <i>Mean pCMV3</i> | <i>Mean PLpro</i> | <i>Mean pCMV3</i> | <i>Mean PLpro</i> |
| EOTAXIN        | 6.232             | 11.203            | 10.520            | 12.958            | 8.328             | 12.806            |
| EOTAXIN-2      | 6.358             | 11.680            | 10.674            | 13.040            | 8.251             | 12.455            |
| GCSF           | 8.695             | 11.774            | 11.557            | 12.774            | 7.906             | 13.015            |
| GM-CSF         | 8.172             | 9.235             | 8.592             | 10.860            | 5.087             | 9.869             |
| ICAM-1         | 30.616            | 30.528            | 32.398            | 30.451            | 44.419            | 60.744            |
| IFN- $\gamma$  | 14.789            | 12.654            | 13.708            | 14.407            | 8.337             | 16.236            |
| I-309          | 15.390            | 12.532            | 12.577            | 13.506            | 6.886             | 13.066            |
| IL-1 $\alpha$  | 18.798            | 15.320            | 13.039            | 13.963            | 6.218             | 13.119            |
| IL-1 $\beta$   | 1.978             | 7.938             | 10.089            | 12.23             | 8.619             | 11.243            |
| IL-2           | 1.210             | 5.603             | 8.571             | 10.264            | 6.630             | 9.157             |
| IL-3           | 2.441             | 7.7               | 10.235            | 11.622            | 8.994             | 12.125            |
| IL-4           | 2.335             | 7.097             | 9.839             | 9.564             | 7.684             | 11.313            |
| IL-6           | 10.919            | 16.342            | 7.458             | 8.4525            | 5.787             | 9.021             |
| IL-6sR         | 12.284            | 13.358            | 17.948            | 17.364            | 21.323            | 28.872            |
| IL-7           | 8.194             | 8.4845            | 10.295            | 10.411            | 7.710             | 10.213            |
| IL-8           | 48.953            | 62.727            | 11.916            | 12.169            | 15.038            | 17.671            |
| IL-10          | 9.219             | 7.134             | 14.072            | 10.619            | 7.349             | 9.097             |
| IL-11          | 11.290            | 9.686             | 10.578            | 12.756            | 7.832             | 12.647            |
| IL-12 p40      | 14.259            | 12.007            | 13.758            | 14.306            | 8.320             | 13.711            |
| IL-12 p70      | 18.657            | 16.880            | 16.392            | 16.477            | 10.266            | 17.258            |
| IL-13          | 3.856             | 5.502             | 9.795             | 9.739             | 9.233             | 10.246            |
| IL-15          | 4.407             | 8.15              | 12.739            | 12.084            | 11.495            | 12.967            |
| IL-16          | 4.536             | 6.231             | 12.824            | 11.925            | 10.792            | 13.378            |
| IL-17          | 2.992             | 5.276             | 10.615            | 8.815             | 8.181             | 11.502            |
| IIP-10         | 9.344             | 8.464             | 14.604            | 13.633            | 12.038            | 15.110            |
| MCP-1          | 5.839             | 8.721             | 12.289            | 8.309             | 8.957             | 9.938             |
| MCP-2          | 10.208            | 8.763             | 12.587            | 8.974             | 9.051             | 10.534            |
| M-CSF          | 15.744            | 13.903            | 16.016            | 13.320            | 13.537            | 18.214            |
| MIG            | 14.966            | 13.864            | 17.596            | 13.847            | 16.297            | 16.691            |
| MIP-1 $\alpha$ | 18.111            | 16.136            | 18.356            | 16.909            | 13.076            | 25.018            |
| MIP-1 $\beta$  | 15.373            | 13.014            | 16.865            | 14.398            | 11.443            | 17.175            |
| MIP-1 $\delta$ | 12.546            | 11.107            | 14.182            | 12.015            | 10.643            | 13.496            |
| RANTES         | 30.834            | 61.17             | 11.591            | 10.209            | 12.084            | 10.323            |
| TGF- $\beta$ 1 | 3.378             | 5.151             | 10.541            | 8.5385            | 9.406             | 9.423             |
| TNF- $\alpha$  | 5.166             | 7.374             | 11.857            | 13.610            | 11.286            | 14.594            |
| TNF- $\beta$   | 4.620             | 6.196             | 11.708            | 8.5425            | 9.961             | 11.357            |
| s TNF RI       | 8.007             | 8.527             | 13.194            | 9.473             | 11.862            | 11.812            |
| s TNF RII      | 10.866            | 9.305             | 15.526            | 11.441            | 14.356            | 12.311            |
| PDGF-BB        | 18.442            | 13.364            | 14.0605           | 8.544             | 13.820            | 11.504            |
| TIMP-2         | 35.236            | 43.716            | 16.01125          | 8.485             | 10.991            | 10.332            |
